# Supplementary material
Source: publisher figshare collection journal article supplement (https://tandf.figshare.com/ndownloader/files/13585607)
Supplement: Supplementary file 1 [file 13585607]

# ACCESSIBLE BRNO CITY CENTRE, THE CZECH REPUBLIC, FOR PEOPLE WITH IMPAIRED MOBILITY, 2016

Jana STEHLÍKOVÁ and Tomáš ŘEZNÍK

Masaryk University, Faculty of Science, Department of Geography

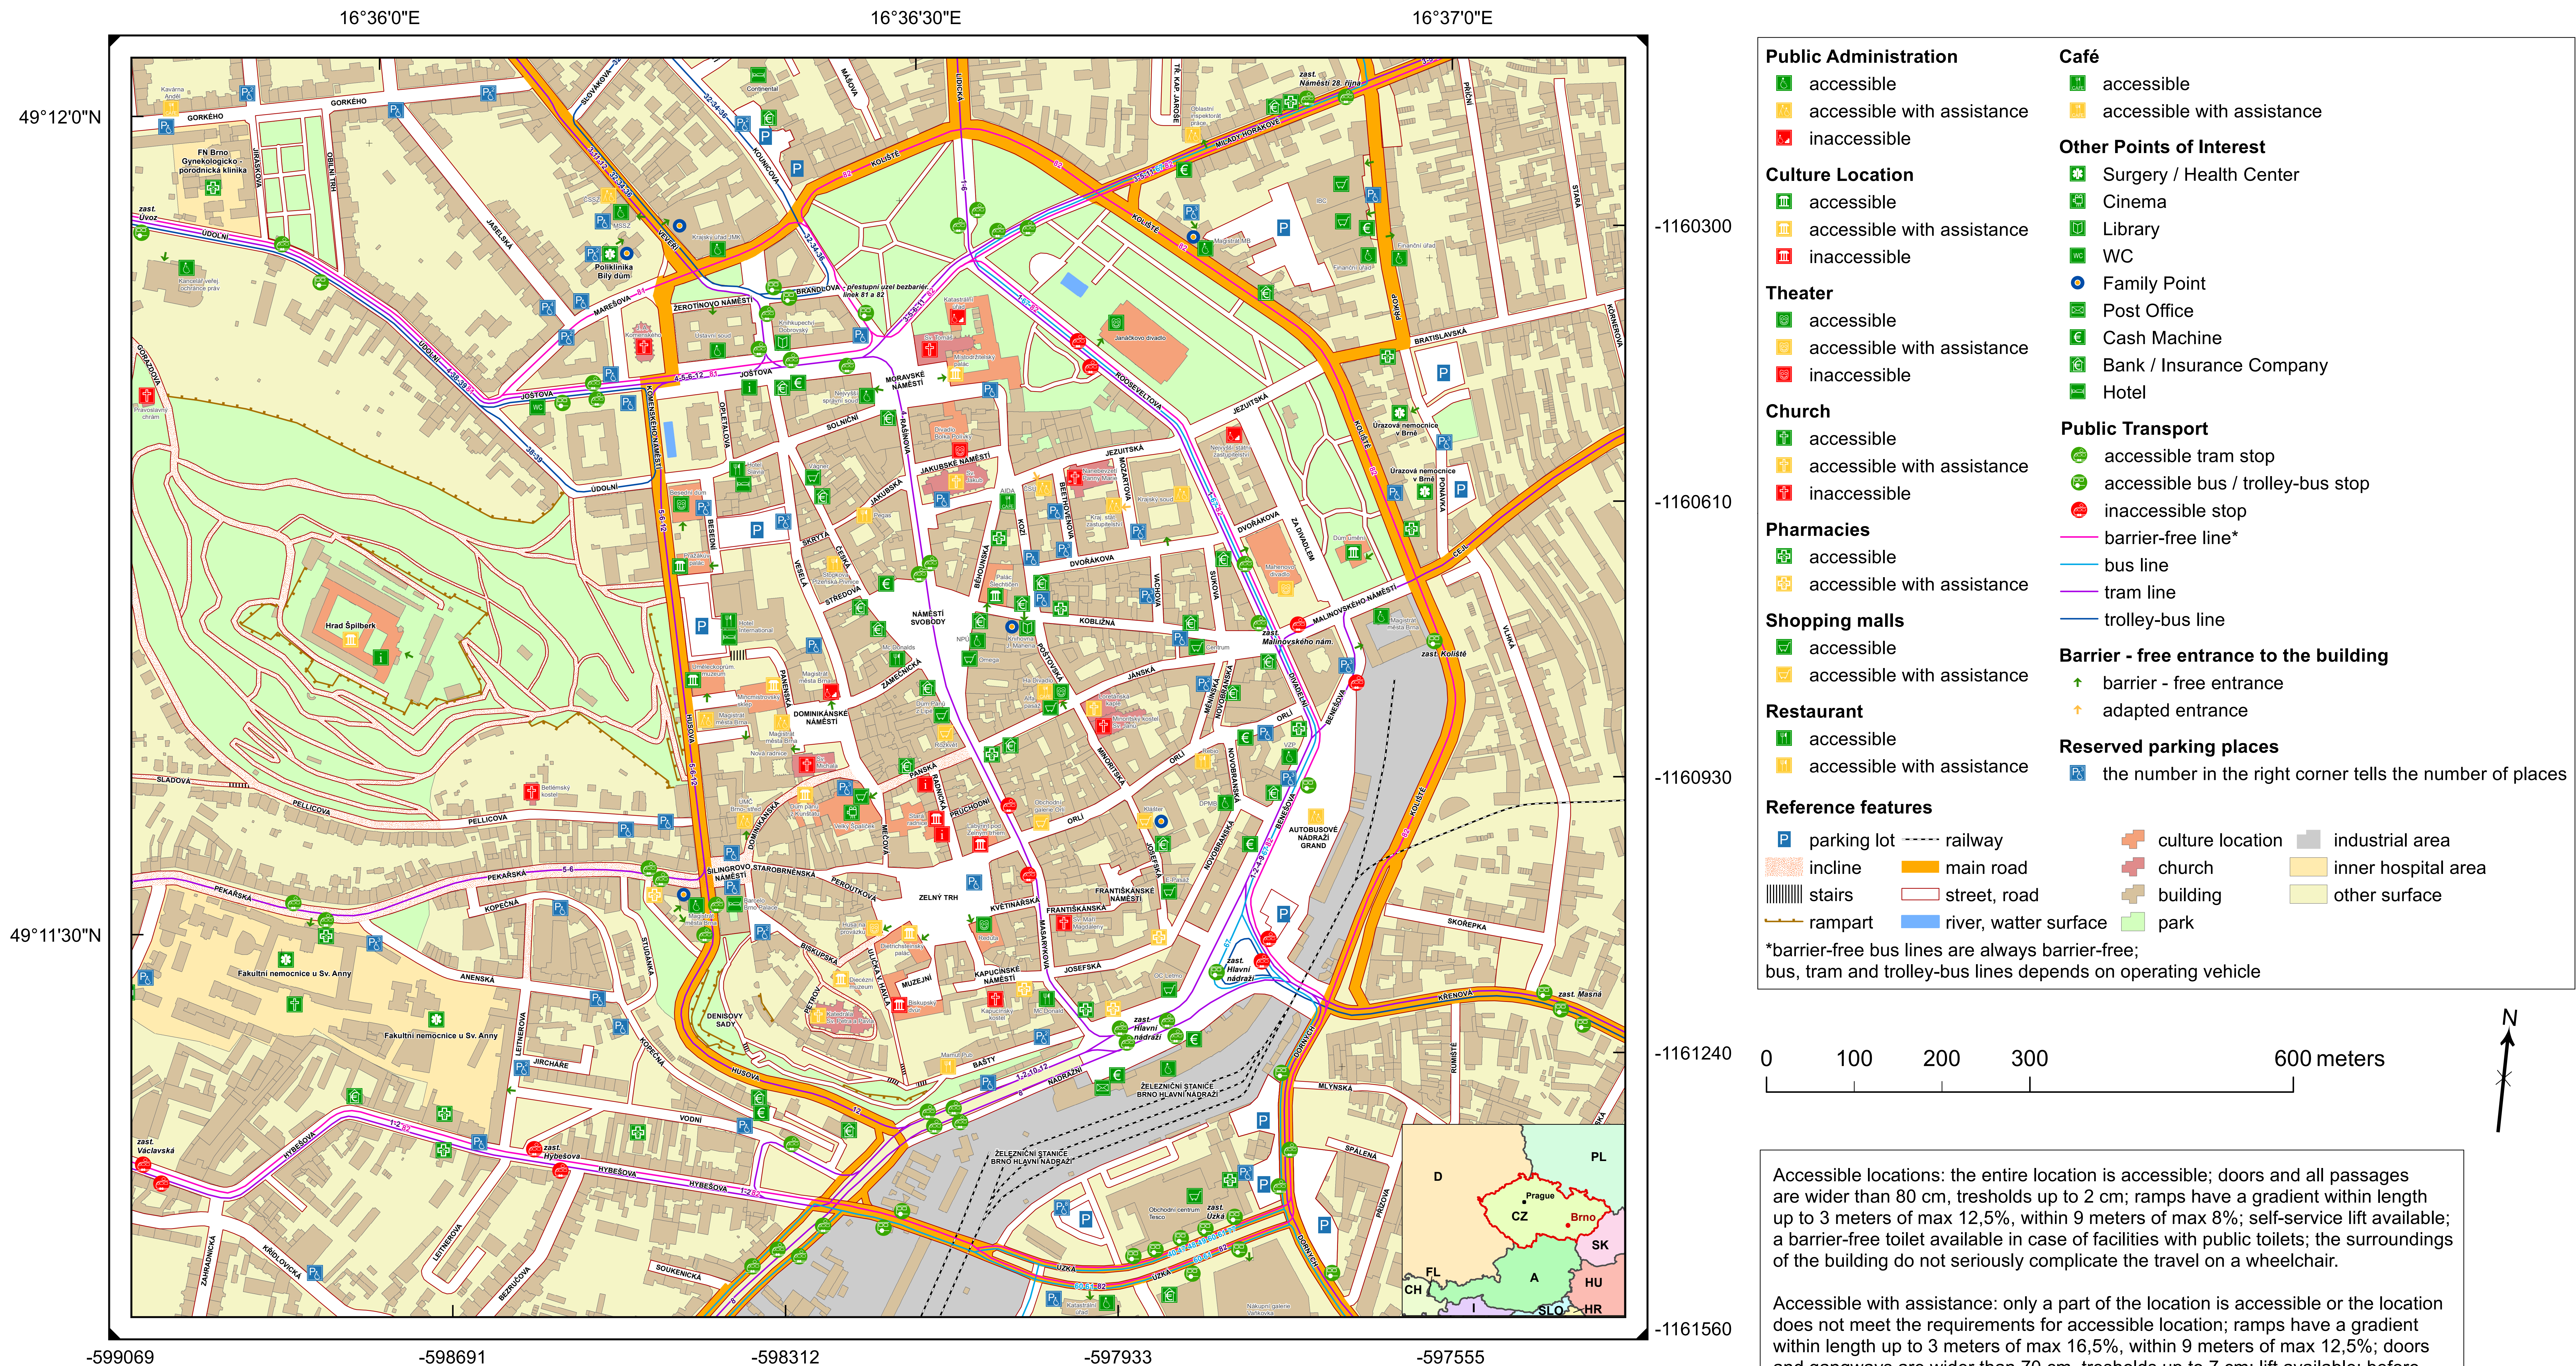

Acknowledgment to Brno City Municipality for their support and accessibility mapping of location displayed in the map. To civic associations Prague Organisation fo Wheelchair User for their support and the general map sign of wheelchair user used in the map and organisation Liga vozíčkářů for their support. The project was financed by internal resources of Masaryk University,

Map projection: Krovak; Map units: meter; Coordinate system: S-JTSK Krovak East North, EPSG 5514;  
Base Map: Brno City Municipality and Institute of Computer Science of Masaryk University released in 2009 with updates in 2015  
Locator map projection: Europe Lambert Conformal Conic, EPSG: 102014; Locator map data: Natural Earth

Accessible locations: the entire location is accessible; doors and all passages are wider than 80 cm, thresholds up to 2 cm; ramps have a gradient within length up to 3 meters of max 12,5%, within 9 meters of max 8%; self-service lift available; a barrier-free toilet available in case of facilities with public toilets; the surroundings of the building do not seriously complicate the travel on a wheelchair.

Accessible with assistance: only a part of the location is accessible or the location does not meet the requirements for accessible location; ramps have a gradient within length up to 3 meters of max 16,5%, within 9 meters of max 12,5%; doors and gangways are wider than 70 cm, thresholds up to 7 cm; lift available; before entrance there is max one step without a solution for its overcoming.

Inaccessible location: access to or traveling within the location is especially complicated.

The parameters were set according to the Czech Notice 398/2009 Sb. which is obligatory to follow.
